# Supplementary material
Source: PubMed Central journal article supplement (PMC1242265)

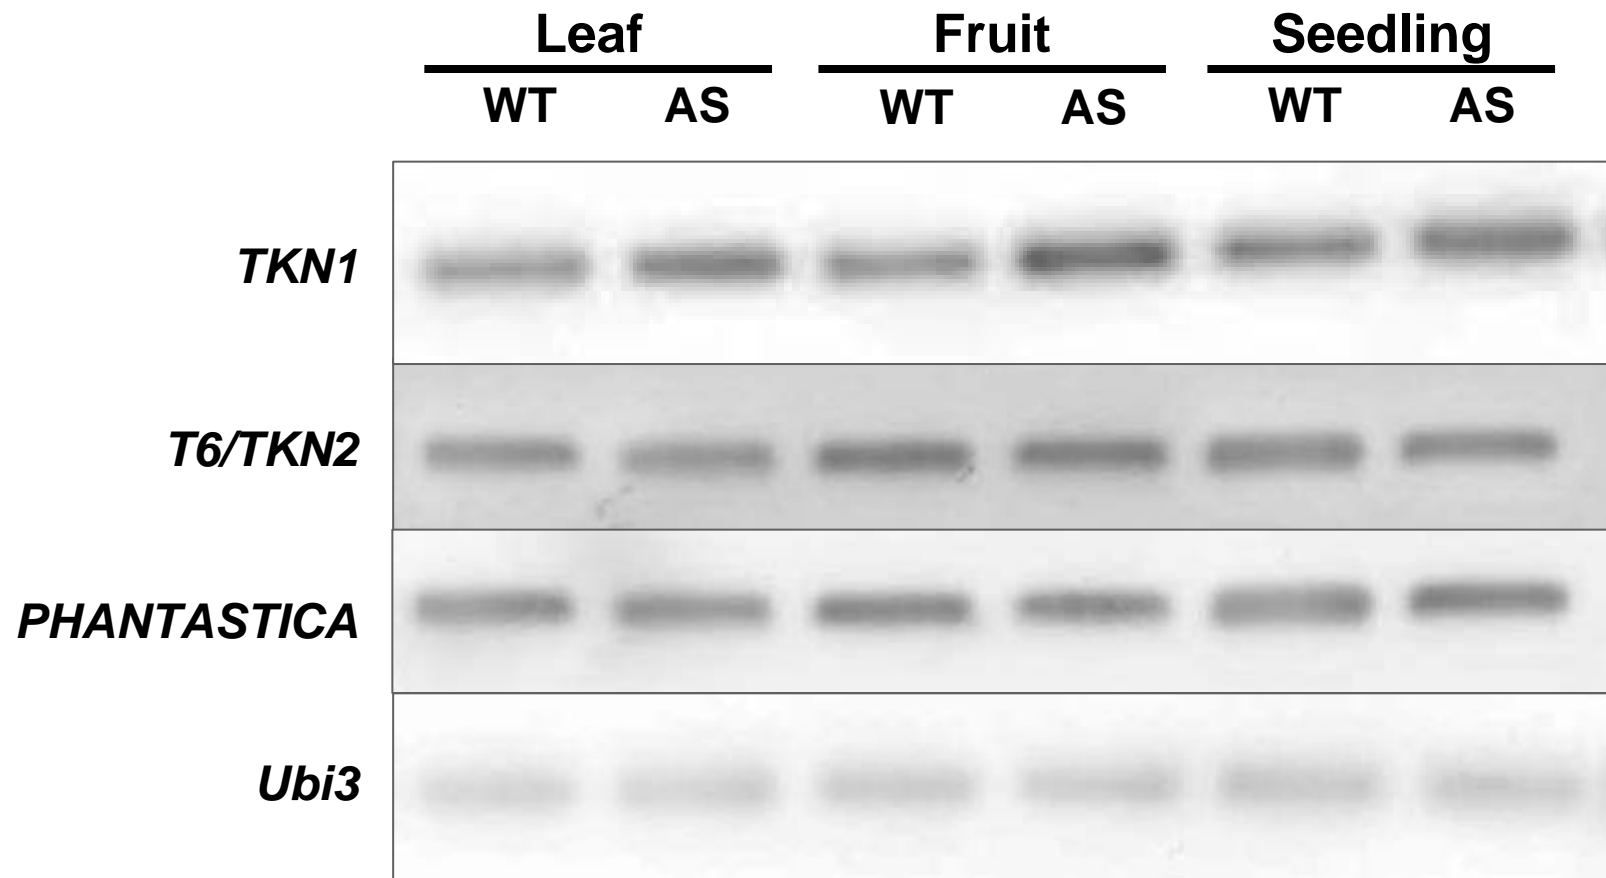

Supplement: plntcell_tpc.105.033415_2.pdf [file plntcell_tpc.105.033415_2.pdf]
